# Supplementary figures and images for: The AP-2 complex has a specialized clathrin-independent role in apical endocytosis and polar growth in fungi
Source: eLife journal article supplement (doi:10.7554/elife.20083), 2017-02-21

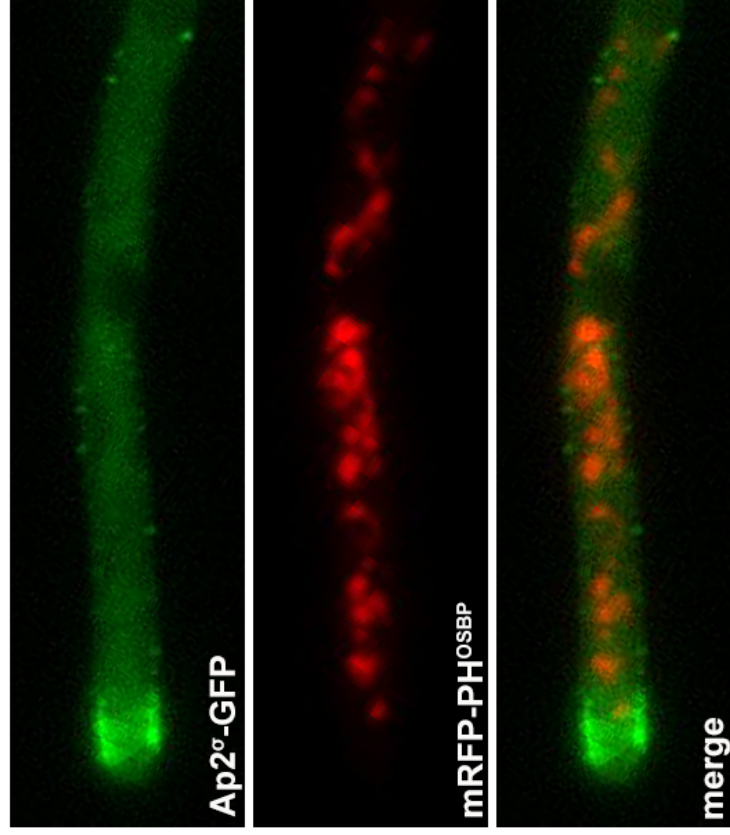

Supplement: supp [file elife-20083-supp-v1.zip]

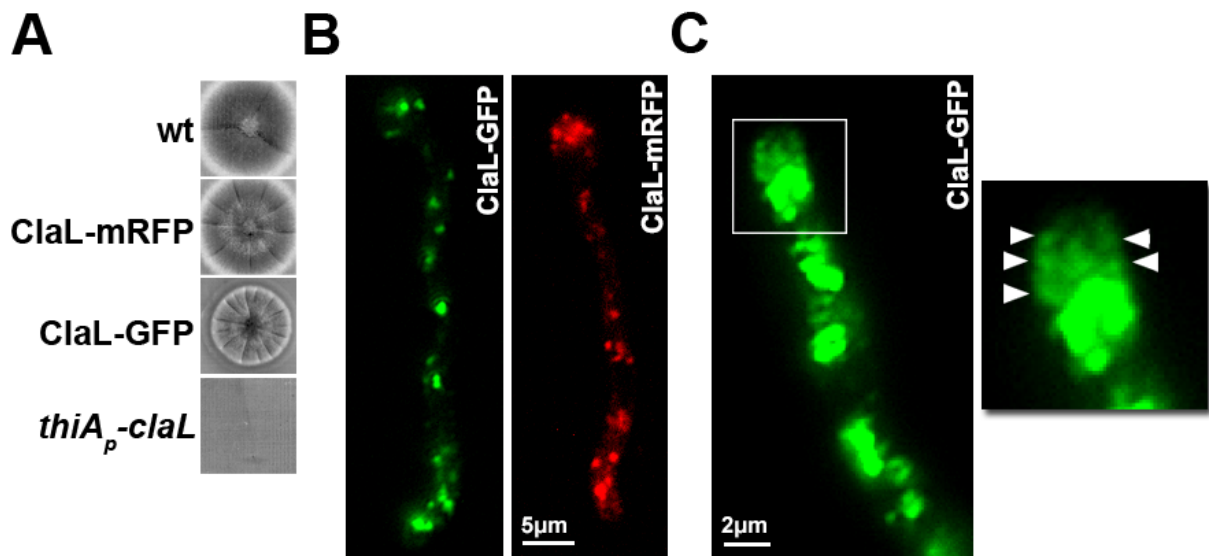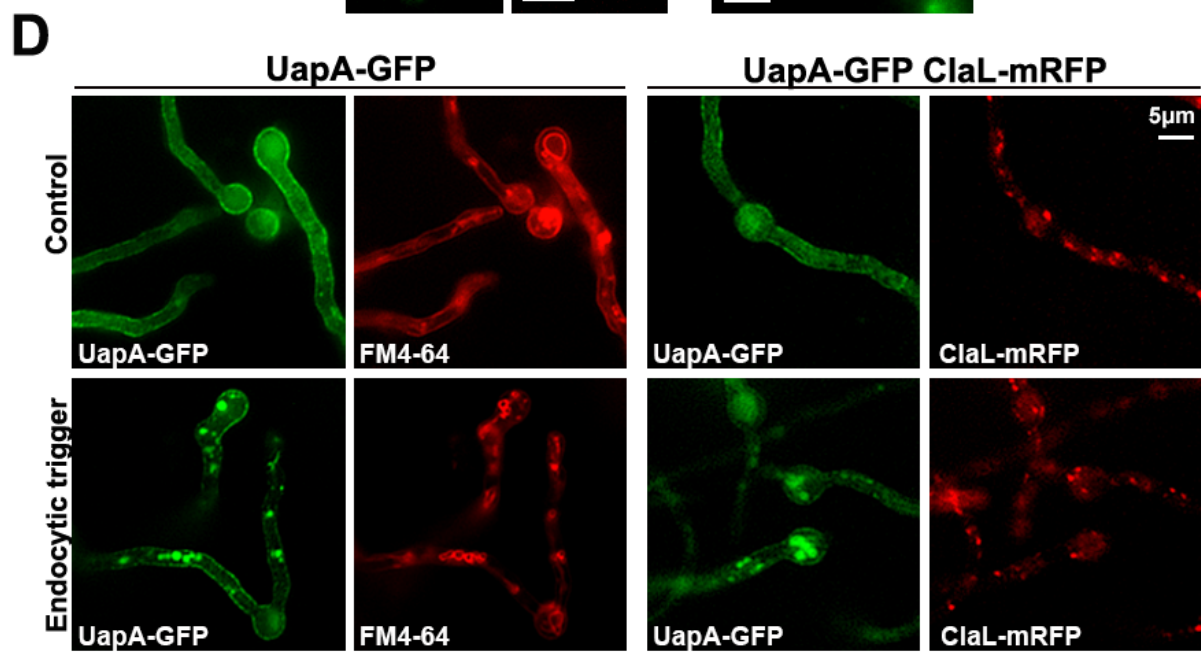

Supplement: supp [file elife-20083-supp-v1.zip]

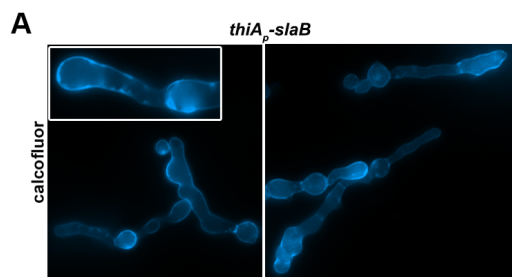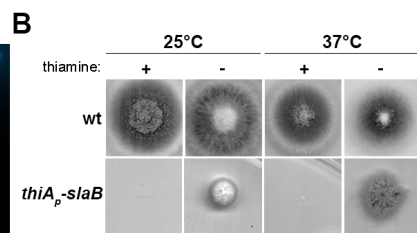

Supplement: supp [file elife-20083-supp-v1.zip]

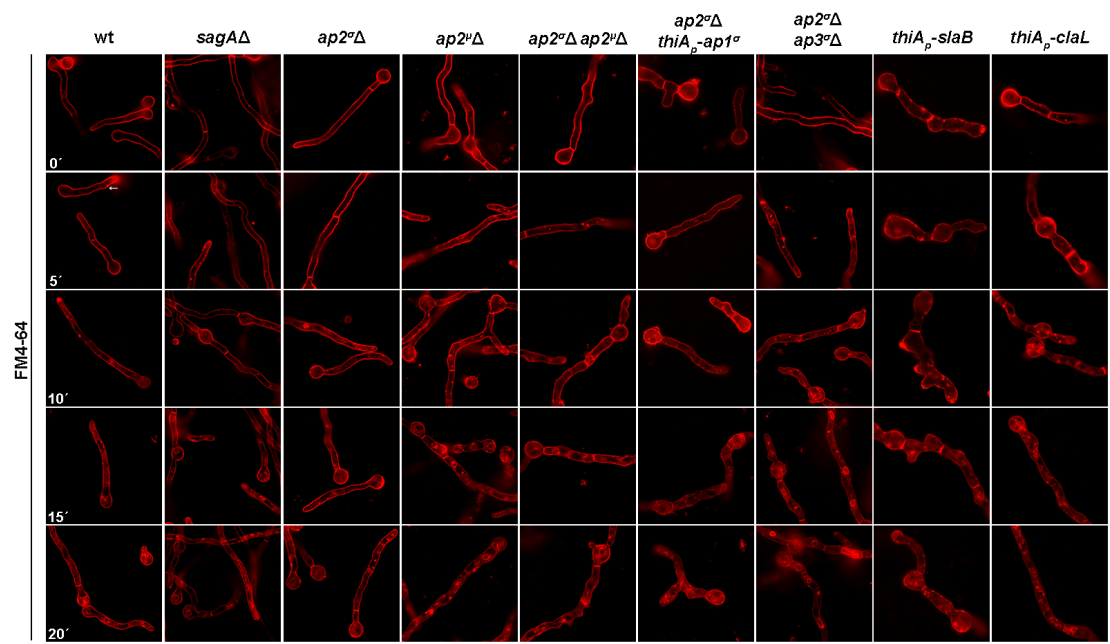

Supplement: supp [file elife-20083-supp-v1.zip]

## A alpha subunits

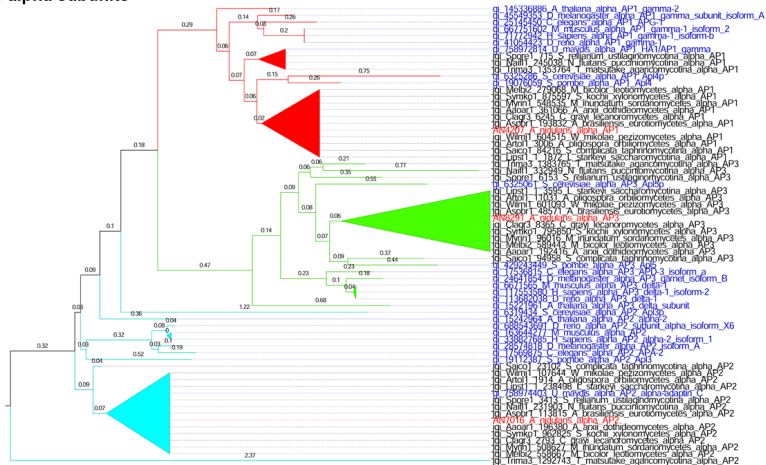

## B beta subunits

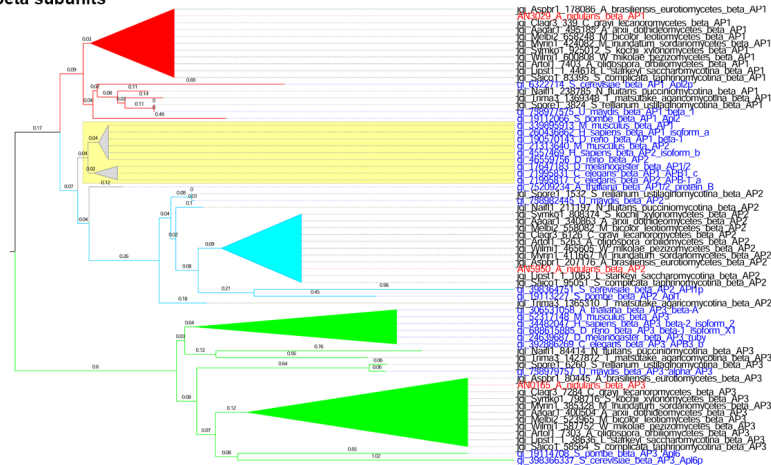

## C mu subunits

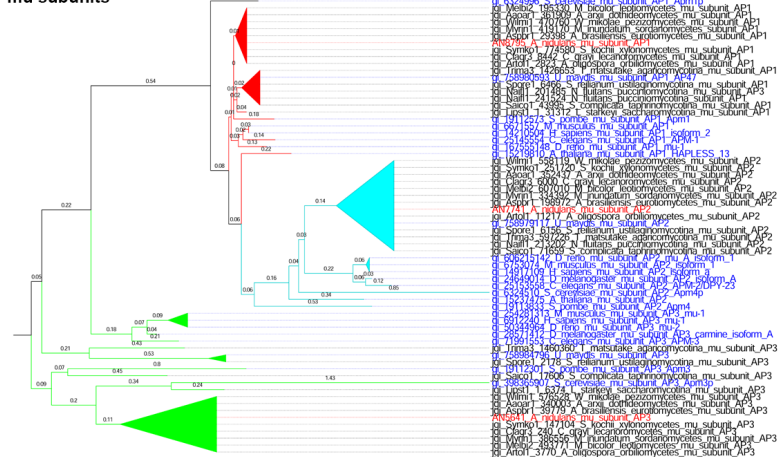

## D sigma subunits

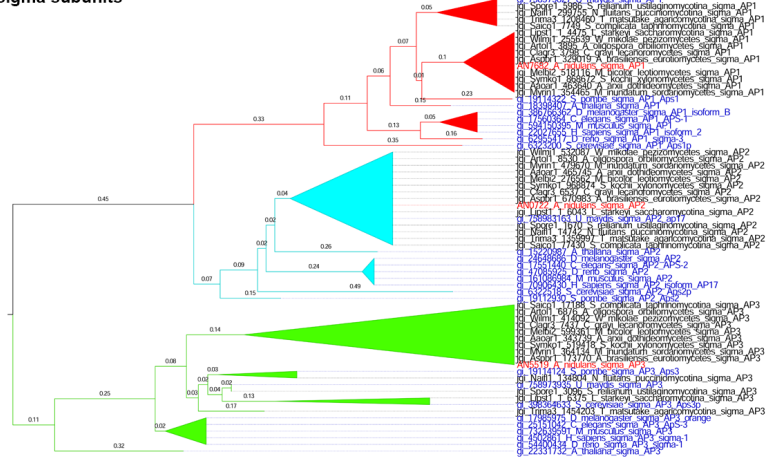

Supplement: supp [file elife-20083-supp-v1.zip]

*thiA<sub>P</sub>-claH DnfA-GFP*

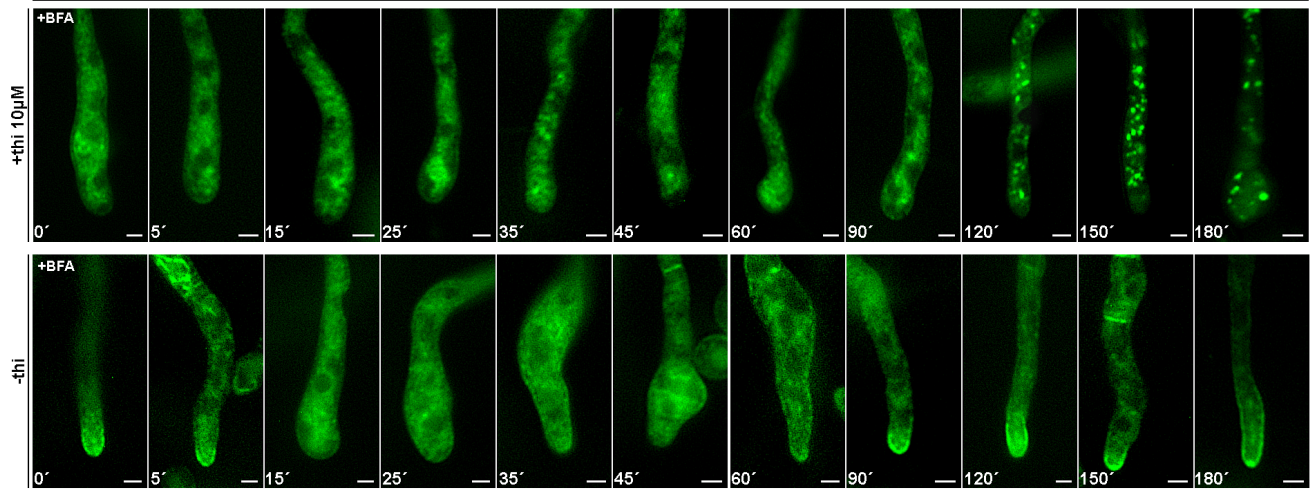

Supplement: supp [file elife-20083-supp-v1.zip]

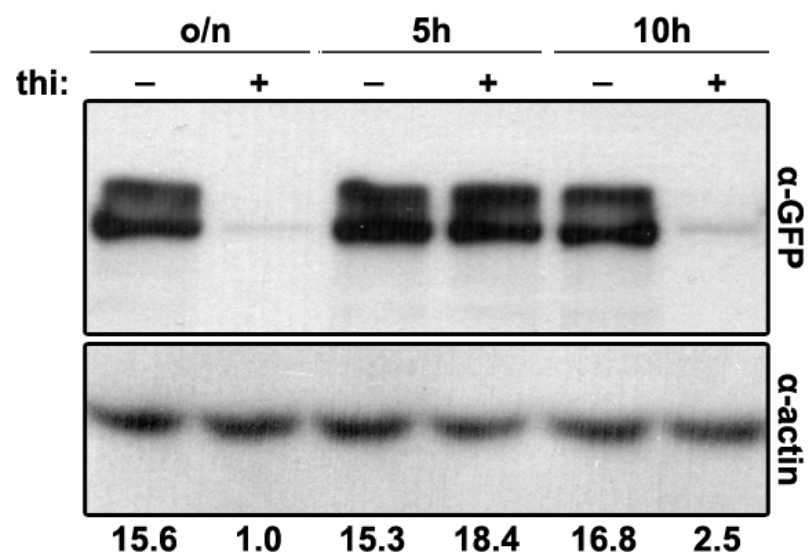

Supplement: supp [file elife-20083-supp-v1.zip]

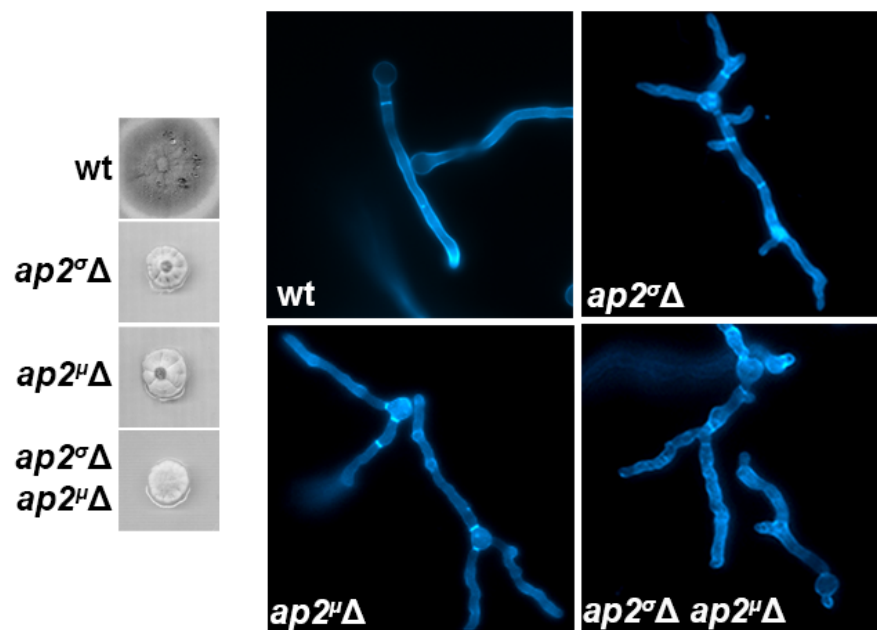

Figure 2

Supplement: supp [file elife-20083-supp-v1.zip]

## A alpha subunits

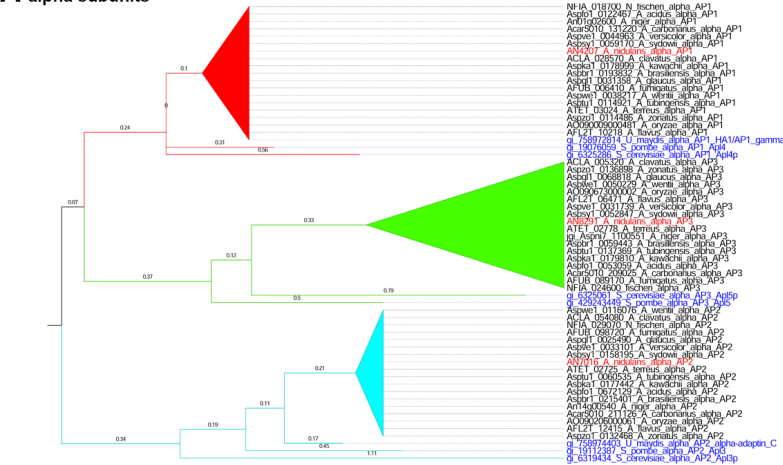

## B beta subunits

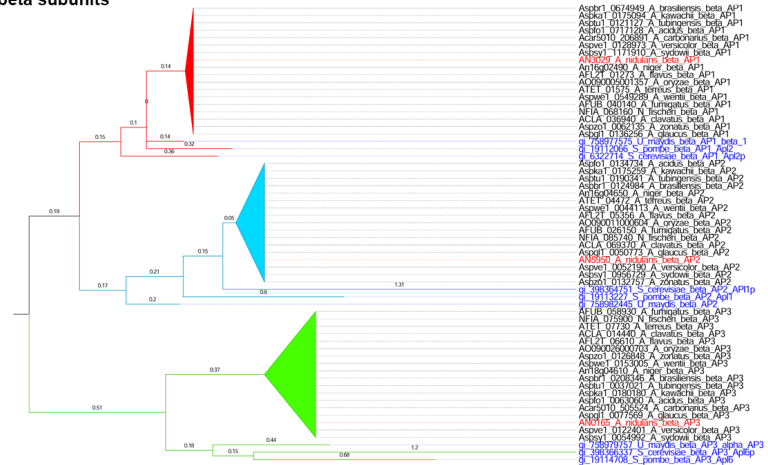

## C mu subunits

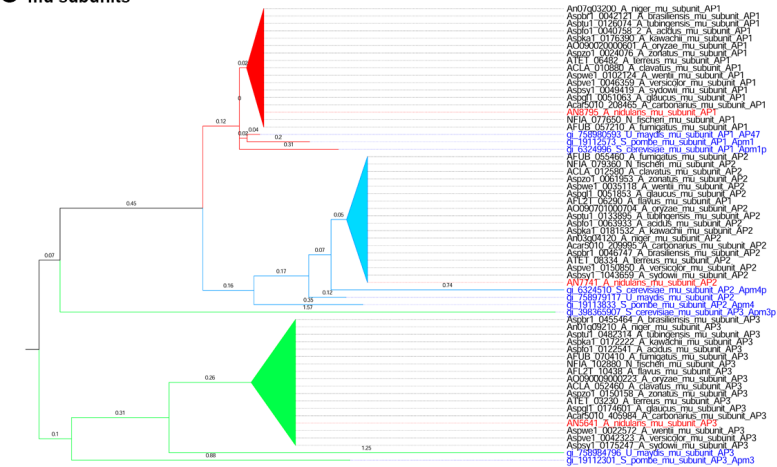

## D sigma subunits

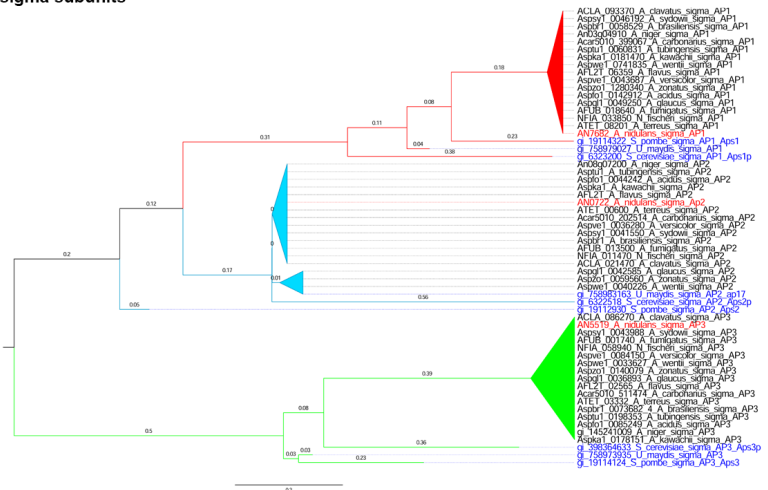

Supplement: supp [file elife-20083-supp-v1.zip]

**A**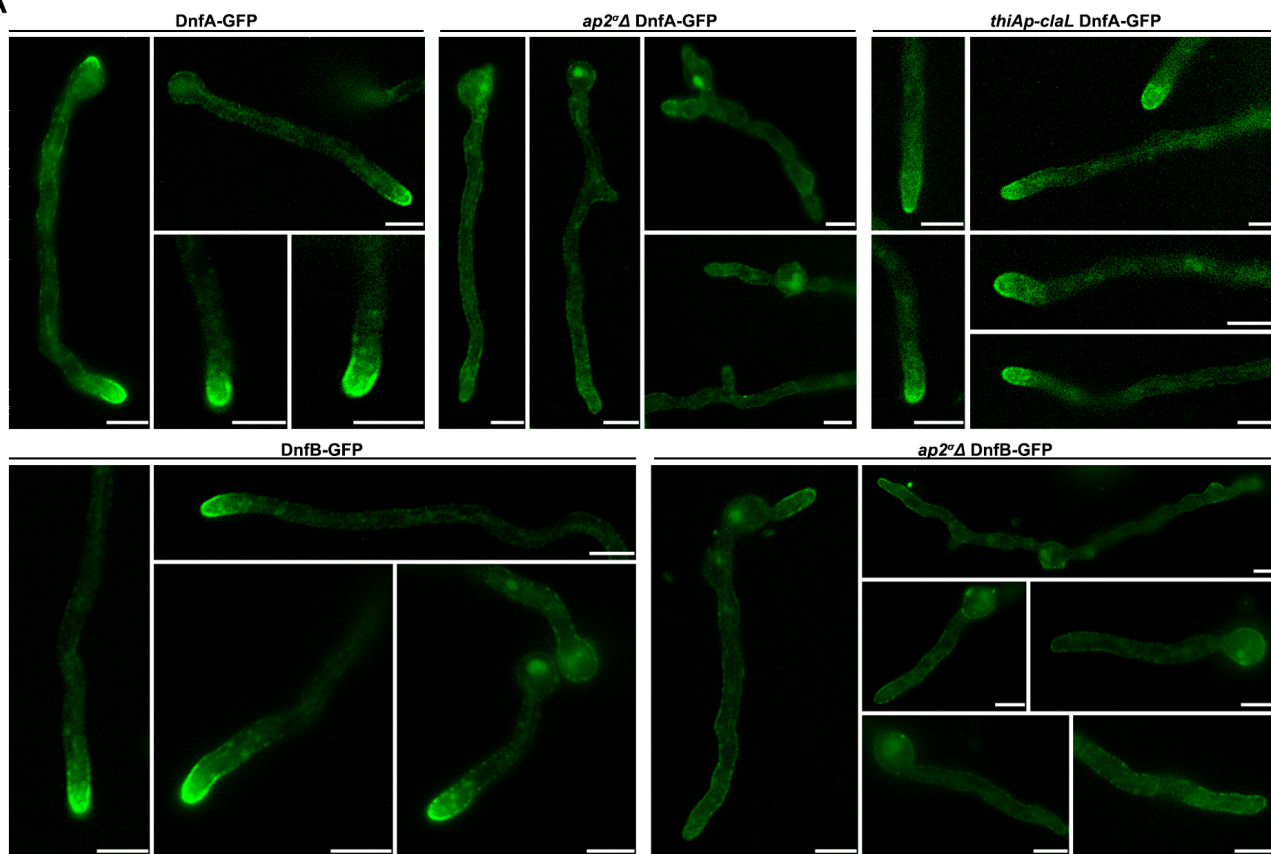**B**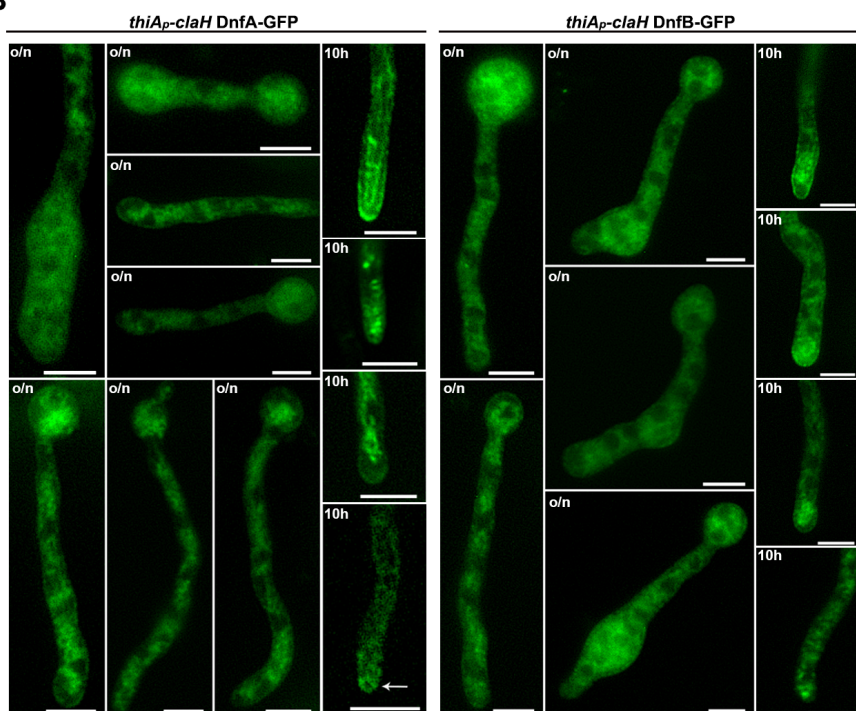

Supplement: supp [file elife-20083-supp-v1.zip]
